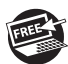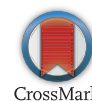

# Metformin Therapy and Circulating NT-proBNP Levels: The CAMERA Trial

Diabetes Care 2016;39:e114–e115 | DOI: 10.2337/dc16-0887

David Preiss,<sup>1</sup> Paul Welsh,<sup>2</sup>  
and Naveed Sattar<sup>2</sup>

Although metformin therapy was initially contraindicated in patients with diabetes and heart failure (HF), its use in patients with HF has gradually expanded, and it has been claimed that metformin therapy may be beneficial in patients with diabetes and stable HF (1). Previous small studies suggested metformin therapy may improve left ventricular function and other functional tests of status (2,3). By contrast, a recent trial of 500 patients showed no effect on left ventricular function over 4 months following myocardial infarction (4). Adding to this literature, our own Carotid Atherosclerosis: Metformin for Insulin ResistAnce (CAMERA) study unexpectedly demonstrated a small, borderline significant, increase in cardiac troponin-T on metformin versus placebo (5). We therefore sought to gain further insight into metformin's potential effect on cardiac function, using N-terminal prohormone brain natriuretic peptide (NT-proBNP) as a surrogate marker.

CAMERA was a randomized placebo-controlled trial studying the effect of metformin over 18 months on surrogate markers of cardiovascular disease in 173 participants with coronary heart disease (CHD) and elevated waist circumferences but without diabetes (ClinicalTrials.gov identifier NCT00723307) (5). As previously reported, metformin therapy had no effect on carotid intima-media thickness but

improved measures of glycemia and insulin resistance and lowered weight by 3.2 kg. Plasma samples were quickly frozen at  $-80^{\circ}\text{C}$  at baseline and subsequently every 6 months. For this post hoc analysis, NT-proBNP was measured using an automated, clinically validated assay with the manufacturer's calibrators and quality-control material (e411; Roche Diagnostics). The control coefficient of variation was  $\leq 5.3\%$ . As NT-proBNP data remained nonparametric after transformation, change in NT-proBNP on placebo and metformin at 6, 12, and 18 months was compared by Mann-Whitney *U* test. Given the potential relationship between adiposity and NT-proBNP, we compared associations between baseline weight and NT-proBNP and between change in weight and change in NT-proBNP in the entire population by linear regression after confirming that the residuals were normally distributed. Analyses were performed using STATA (version 13.1), and a threshold *P* value of  $<0.05$  was selected to indicate statistical significance.

The average age of participants was 64 years. The median NT-proBNP was 92 pg/mL (interquartile range 47–166) for placebo-treated participants, whereas the median NT-proBNP was 88 pg/mL (59–203) for metformin-treated participants, which are relatively high levels as expected for a CHD population.

NT-proBNP data during the trial are provided in Fig. 1. There was no difference between treatment arms at 6 months ( $P = 0.20$ ), 12 months ( $P = 0.61$ ), or 18 months ( $P = 0.17$ ). There was no association between baseline weight and NT-proBNP ( $\beta$ -coefficient  $-0.69$  [95% CI  $-3.56$  to  $2.17$ ];  $P = 0.63$ ). There was also no relationship between change in weight and change in NT-proBNP at 6 months ( $\beta$ -coefficient  $-1.99$  [95% CI  $-7.33$  to  $3.35$ ];  $P = 0.46$ ), 12 months ( $\beta$ -coefficient  $-3.0$  [95% CI  $-9.90$  to  $3.82$ ];  $P = 0.382$ ), or 18 months ( $\beta$ -coefficient  $-3.92$  [95% CI  $-8.40$  to  $0.55$ ];  $P = 0.085$ ), with no evidence of interaction by treatment group.

Metformin has no effect on NT-proBNP levels for up to 18 months in individuals with CHD, suggesting no detrimental or beneficial impact on cardiac function in such individuals. Any effect on clinical outcomes in patients with HF, if confirmed, is unexplained.

**Acknowledgments.** The authors thank Elaine Butler and Sara Jane Duffus for performing the biochemistry analyses at the British Heart Foundation Glasgow Cardiovascular Research Centre. **Funding.** CAMERA was funded by a project grant from the Scotland Chief Scientist Office (CZB/4/613), which had no influence over the trial's conduct. Trial medication and matching placebo were provided for free by Merck

<sup>1</sup>Clinical Trial Service Unit and Epidemiological Studies Unit, University of Oxford, Oxford, U.K.

<sup>2</sup>British Heart Foundation Glasgow Cardiovascular Research Centre, University of Glasgow, Glasgow, U.K.

Corresponding author: David Preiss, david.preiss@ndph.ox.ac.uk.

Received 25 April 2016 and accepted 30 April 2016.

Clinical trial reg. no. NCT00723307, clinicaltrials.gov.

© 2016 by the American Diabetes Association. Readers may use this article as long as the work is properly cited, the use is educational and not for profit, and the work is not altered.

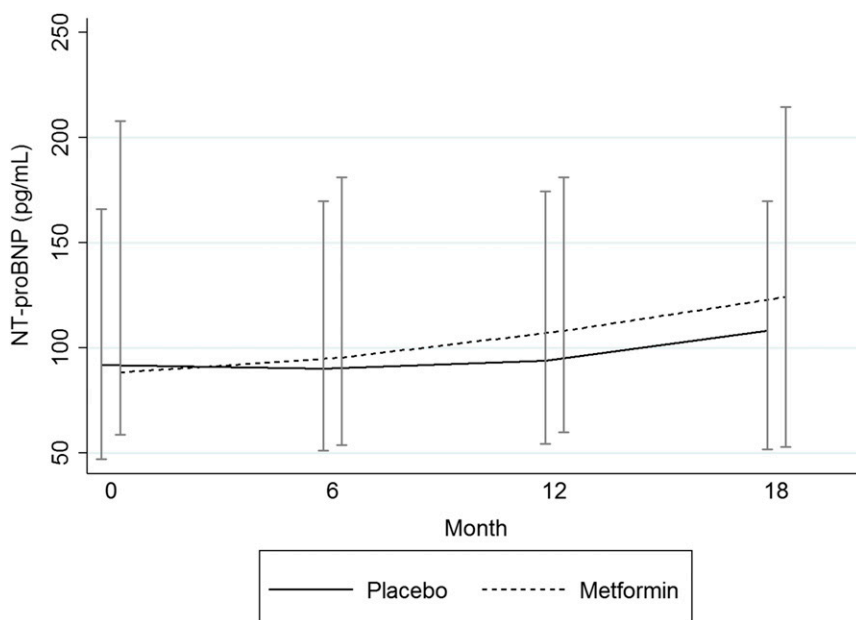

**Figure 1**—NT-proBNP levels in metformin- and placebo-treated participants in the CAMERA study.

Serono, which had no influence over the conduct of the trial or analysis of results. NT-proBNP assays were funded by an endowment grant from NHS Greater Glasgow and Clyde (CHO1/13).

**Duality of Interest.** No potential conflicts of interest relevant to this article were reported.

**Author Contributions.** D.P. researched the data, performed statistical analyses, and

wrote the manuscript. P.W. and N.S. researched the data and edited the manuscript. D.P. is the guarantor of this work and, as such, had full access to all the data in the study and takes responsibility for the integrity of the data and the accuracy of the data analysis.

## References

1. Shah DD, Fonarow GC, Horwich TB. Metformin therapy and outcomes in patients with advanced systolic heart failure and diabetes. *J Card Fail* 2010;16:200–206
2. Wong AK, Symon R, AlZadjali MA, et al. The effect of metformin on insulin resistance and exercise parameters in patients with heart failure. *Eur J Heart Fail* 2012;14:1303–1310
3. Cadeddu C, Nocco S, Cugusi L, et al. Effects of metformin and exercise training, alone or in combination, on cardiac function in individuals with insulin resistance. *Cardiol Ther* 2016; 1:63–73
4. Lexis CP, van der Horst IC, Lipsic E, et al.; GIPS-III Investigators. Effect of metformin on left ventricular function after acute myocardial infarction in patients without diabetes: the GIPS-III randomized clinical trial. *JAMA* 2014; 311:1526–1535
5. Preiss D, Lloyd SM, Ford I, et al. Metformin for non-diabetic patients with coronary heart disease (the CAMERA study): a randomised controlled trial. *Lancet Diabetes Endocrinol* 2014; 2:116–124
